# Supplementary material
Source: MDPI journal article supplement (https://www.mdpi.com/search?q=crystals-11-00780)
Supplement: s001 [file crystals-11-00780-s001.zip]

Archive with 1 entries (1 files):
- crystals-1252971-supplementary.pdf
